# Supplementary material for: Assessing Institutional Stakeholders’ Perception and Limitations on Coping Strategies in Flooding Risk Management in West Africa
Source: MDPI journal article supplement (doi:10.3390/ijerph19116933), 2022-06-06
Supplement: s1 [file s1]

## **Stakeholder Interview Questions – LIRA 2030 Project**

**Project:** Mitigating risks to flood-related waterborne diseases in Abidjan and Kampala

|                                |                    |
|--------------------------------|--------------------|
| Interviewee: _____             | Date: _____        |
| Interviewee affiliation: _____ | Site: _____        |
| Type of stakeholder: _____     | Interviewer: _____ |

Years of flooding experienced by the populations

-----

Main geographical areas affected by flooding

-----

Legal and institutional framework for the protection of the rights of vulnerable populations in case of flooding

-----

Policy for the management of waterborne diseases in times of flooding

-----

Status of stakeholders involved in flood management (who is involved in flood management?)

-----

Level of collaboration between actors involved

-----

Actions already carried out to support the populations or the focal point in the management of flood risks (morale, donation of medicine, food)

-----

People most affected by flooding in your area

-----

Gender mainstreaming during your flood management activities (the consideration of women, are there any of women, are there any special provisions for women)

-----

Policy for the management of waterborne diseases in times of flooding

-----

Flood risk prevention and response measures

-----

Actions already carried out to support the populations or the focal point in the management of flood risks (morale, donation of medicine, food)

-----
